# Supplementary material for: Acclimatization of a coral-dinoflagellate mutualism at a CO2 vent
Source: Springer Nature journal article supplement (doi:10.1038/s42003-022-04327-3), 2023-01-18
Supplement: MOESM2 [file 42003_2022_4327_MOESM2_ESM.pdf]

## Acclimatization of a coral-algal mutualism at a CO<sub>2</sub> vent

Fiorella Prada<sup>1,11,13,15</sup>, Silvia Franzellitti<sup>2,11,15</sup>, Erik Caroselli<sup>1,11\*</sup>, Itay Cohen<sup>3</sup>, Mauro Marini<sup>4,11</sup>, Alessandra Campanelli<sup>4</sup>, Lorenzo Sana<sup>2</sup>, Arianna Mancuso<sup>1,11</sup>, Chiara Marchini<sup>1,11</sup>, Alessia Puglisi<sup>2</sup>, Marco, Candela<sup>5,11</sup>, Tali Mass<sup>6</sup>, Franco Tassi<sup>7,12</sup>, Todd C. LaJeunesse<sup>8\*</sup>, Zvy Dubinsky<sup>9</sup>, Giuseppe Falini<sup>10,11,14</sup>, Stefano Goffredo<sup>1,11,14\*</sup>

### SUPPLEMENTARY MATERIALS

#### Supplementary Figures

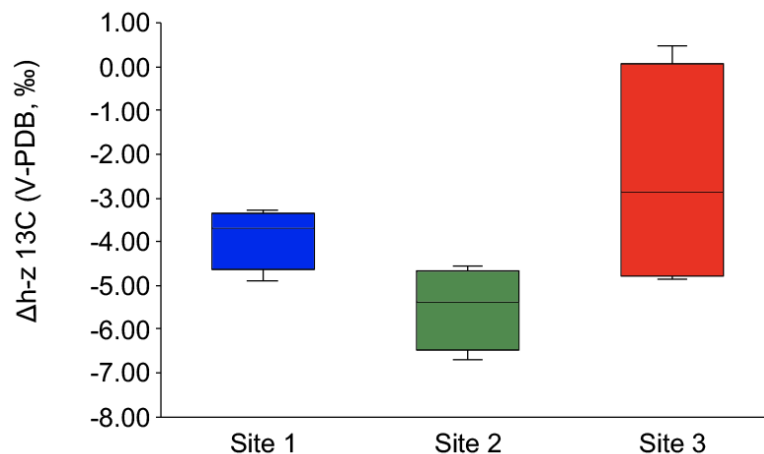

**Supplementary Figure 1.** Average  $\Delta^{h-z} {}^{13}\text{C}$  (V-PDB, ‰) values in *B. europaea* from Sites 1 (control), 2 (intermediate pCO<sub>2</sub>) and 3 (high pCO<sub>2</sub>). The boxes indicate the 25<sup>th</sup> and 75<sup>th</sup> percentiles and the line within the boxes mark the medians. Whisker length is equal to 1.5 × interquartile range (IQR).

## SUPPLEMENTARY TABLES

**Supplementary Table 1.** Seawater carbonate chemistry data for each study site. Data are presented as mean values with 95% CIs in brackets. N = number of observations; T = temperature (number of observations); TA = total alkalinity; pCO<sub>2</sub> = carbon dioxide partial pressure; HCO<sub>3</sub><sup>-</sup> = bicarbonate; CO<sub>3</sub><sup>2-</sup> = carbonate; DIC = dissolved inorganic carbon; Ω<sub>arag</sub> = aragonite saturation; NS = not significant; \*p<0.05, \*\*\*p<0.001, Kruskal-Wallis equality-of- populations rank test. pH<sub>Ts</sub>, T, TA, and salinity were used to calculate the carbonate system parameters, denoted by (a). Pairwise comparisons between Sites were performed with Mann-Whitney U test. \*\*p< 0.01, \*\*\*p< 0.001, NS = not significant

|                             | pH <sub>Ts</sub>    | Salinity (‰)        | T (°C)              | TA<br>(μmol/kg)     | pCO <sub>2</sub><br>(μatm) <sup>a</sup> | HCO <sub>3</sub> <sup>-</sup><br>(μmol/kg) <sup>a</sup> | CO <sub>3</sub> <sup>2-</sup><br>(μmol/kg) <sup>a</sup> | CO <sub>2</sub><br>(μmol/kg) <sup>a</sup> | DIC<br>(μmol/kg) <sup>a</sup> | Ω <sub>calc</sub> <sup>a</sup> | Ω <sub>arag</sub> <sup>a</sup> |
|-----------------------------|---------------------|---------------------|---------------------|---------------------|-----------------------------------------|---------------------------------------------------------|---------------------------------------------------------|-------------------------------------------|-------------------------------|--------------------------------|--------------------------------|
| <b>Site 1</b>               | 7.97<br>(7.95-7.99) | 35.6<br>(35.5-35.8) | 21.1<br>(20.5-21.7) | 2368<br>(2277-2459) | 437<br>(415-459)                        | 1888<br>(1867-1909)                                     | 207<br>(199-216)                                        | 13.7<br>(13.0-14.4)                       | 2109<br>(2094-2124)           | 4.9<br>(4.7-5.1)               | 3.2<br>(3.1-3.4)               |
|                             | N = 198             | N = 195             | N = 198             | N = 26              | N = 195                                 | N = 195                                                 | N = 195                                                 | N = 195                                   | N = 195                       | N = 195                        | N = 195                        |
| <b>Site 2</b>               | 7.86<br>(7.83-7.90) | 35.5<br>(35.3-35.7) | 21.1<br>(20.5-21.8) | 2288<br>(2217-2359) | 654<br>(589-720)                        | 1927<br>(1902-1952)                                     | 157<br>(150-165)                                        | 20.4<br>(18.5-22.3)                       | 2105<br>(2082-2127)           | 3.7<br>(3.3-3.9)               | 2.5<br>(2.3-2.6)               |
|                             | N = 185             | N = 185             | N = 185             | N = 25              | N = 185                                 | N = 185                                                 | N = 185                                                 | N = 185                                   | N = 185                       | N = 185                        | N = 185                        |
| <b>Site 3</b>               | 7.64<br>(7.55-7.77) | 35.6<br>(35.4-35.8) | 21.1<br>(20.5-21.7) | 2348<br>(2296-2399) | 1161<br>(832-1490)                      | 1995<br>(1973-2018)                                     | 146<br>(138-154)                                        | 35.7<br>(26.1-45.2)                       | 2177<br>(2155-2199)           | 3.5<br>(3.3-3.7)               | 2.3<br>(2.2-2.4)               |
|                             | N = 189             | N = 184             | N = 189             | N = 22              | N = 184                                 | N = 184                                                 | N = 184                                                 | N = 184                                   | N = 184                       | N = 184                        | N = 184                        |
| <b>Pairwise comparisons</b> |                     |                     |                     |                     |                                         |                                                         |                                                         |                                           |                               |                                |                                |
| <b>1 vs 2</b>               | ***                 | NS                  | NS                  | NS                  | ***                                     | ***                                                     | ***                                                     | ***                                       | <b>NS</b>                     | ***                            | ***                            |
| <b>1 vs 3</b>               | ***                 | NS                  | NS                  | NS                  | ***                                     | ***                                                     | ***                                                     | ***                                       | **                            | ***                            | ***                            |
| <b>2 vs 3</b>               | ***                 | NS                  | NS                  | NS                  | ***                                     | ***                                                     | ***                                                     | ***                                       | **                            | <b>NS</b>                      | <b>NS</b>                      |

**Supplementary Table 2.** Average concentration of sulphate (N = 5), phosphate (N = 4) and inorganic nitrogen (N = 4) in the seawater at the four sites. Data are presented as mean  $\pm$  Standard Deviation (SD). The analytical error for sulphate is < 5%. Pairwise comparisons between Sites were performed with Mann-Whitney U test. \*p < 0.05, \*\*p < 0.01, NS = not significant

|                             | <b>SO<sub>4</sub><sup>2-</sup></b><br><b>(<math>\mu\text{mol L}^{-1}</math>)</b> | <b>PO<sub>4</sub><sup>3-</sup></b><br><b>(<math>\mu\text{mol L}^{-1}</math>)</b> | <b>NO<sub>x</sub>(NO<sub>2</sub>+NO<sub>3</sub>)</b><br><b>(<math>\mu\text{mol L}^{-1}</math>)</b> |
|-----------------------------|----------------------------------------------------------------------------------|----------------------------------------------------------------------------------|----------------------------------------------------------------------------------------------------|
| <b>Site 1</b>               | 36852<br>( $\pm 1243$ )                                                          | 0.802<br>( $\pm 1.355$ )                                                         | 0.515<br>( $\pm 0.450$ )                                                                           |
| <b>Site 2</b>               | 35686<br>( $\pm 2188$ )                                                          | 0.158<br>( $\pm 0.162$ )                                                         | 0.113<br>( $\pm 0.184$ )                                                                           |
| <b>Site 3</b>               | 31855<br>( $\pm 1001$ )                                                          | 0.393<br>( $\pm 0.419$ )                                                         | 0.758<br>( $\pm 0.997$ )                                                                           |
| <b>Pairwise comparisons</b> |                                                                                  |                                                                                  |                                                                                                    |
| <b>1 vs 2</b>               | NS                                                                               | NS                                                                               | NS                                                                                                 |
| <b>1 vs 3</b>               | **                                                                               | NS                                                                               | NS                                                                                                 |
| <b>2 vs 3</b>               | *                                                                                | NS                                                                               | NS                                                                                                 |

**Supplementary Table 3.** Number of coral specimens measured by PAM fluorometry in the three Sites across the sampling period.

| Date      | Time interval | Number of corals |            |            |            |
|-----------|---------------|------------------|------------|------------|------------|
|           |               | Site 1           | Site 2     | Site 3     | Total      |
| 22/7/2019 | 18:00-20:00   | 10               | 10         | 10         | 30         |
| 23/7/2019 | 9:00-13:00    | 17               | 13         | 15         | 45         |
| 23/7/2019 | 20:00-22:00   | 11               | 8          | 11         | 30         |
| 24/7/2019 | 9:00-13:00    | 21               | 22         | 25         | 68         |
| 24/7/2019 | 20:00-22:00   | 14               | 9          | 15         | 38         |
| 25/7/2019 | 18:00-20:00   | 22               | 19         | 20         | 61         |
| 26/7/2019 | 18:00-20:00   | 19               | 19         | 19         | 57         |
| 14/2/2020 | 9:00-13:00    | 8                | 9          | 7          | 24         |
|           | <b>TOTAL</b>  | <b>122</b>       | <b>109</b> | <b>122</b> | <b>353</b> |
|           | 9:00-13:00    | 46               | 44         | 47         | <b>137</b> |
|           | 18:00-20:00   | 51               | 48         | 49         | <b>148</b> |
|           | 20:00-22:00   | 25               | 17         | 26         | <b>68</b>  |

**Supplementary Table 4.** Average values for the three fluorescence parameters  $\Delta F/F_m'$ , F, and F' at the three sites in the three time intervals.

|             |                                   | <b>N</b> | <b>Mean (95% CI)</b> |
|-------------|-----------------------------------|----------|----------------------|
| 9:00-13:00  | <b><math>\Delta F/F_m'</math></b> |          |                      |
|             | Site 1                            | 46       | 0.52 (0.49-0.55)     |
|             | Site 2                            | 44       | 0.53 (0.50-0.57)     |
|             | Site 3                            | 47       | 0.55 (0.53-0.58)     |
|             | <b>F</b>                          |          |                      |
|             | Site 1                            | 46       | 258 (234-282)        |
|             | Site 2                            | 44       | 303 (272-333)        |
|             | Site 3                            | 47       | 314 (289-340)        |
|             | <b>Fm'</b>                        |          |                      |
|             | Site 1                            | 46       | 563 (503-623)        |
|             | Site 2                            | 44       | 718 (604-832)        |
|             | Site 3                            | 47       | 745 (658-832)        |
| 18:00-20:00 | <b><math>\Delta F/F_m'</math></b> |          |                      |
|             | Site 1                            | 51       | 0.60 (0.59-0.62)     |
|             | Site 2                            | 48       | 0.61 (0.60-0.63)     |
|             | Site 3                            | 49       | 0.59 (0.58-0.60)     |
|             | <b>F</b>                          |          |                      |
|             | Site 1                            | 51       | 351 (321-381)        |
|             | Site 2                            | 48       | 443 (404-462)        |
|             | Site 3                            | 49       | 421 (400-443)        |
|             | <b>Fm'</b>                        |          |                      |
|             | Site 1                            | 51       | 849 (783-916)        |
|             | Site 2                            | 48       | 1113 (1049-1212)     |
|             | Site 3                            | 49       | 1037 (984-1091)      |
| 20:00-22:00 | <b><math>\Delta F/F_m'</math></b> |          |                      |
|             | Site 1                            | 25       | 0.58 (0.56-0.61)     |
|             | Site 2                            | 17       | 0.59 (0.54-0.64)     |
|             | Site 3                            | 26       | 0.59 (0.57-0.62)     |
|             | <b>F</b>                          |          |                      |
|             | Site 1                            | 25       | 190 (172-208)        |
|             | Site 2                            | 17       | 279 (248-310)        |
|             | Site 3                            | 26       | 306 (288-324)        |
|             | <b>Fm'</b>                        |          |                      |
|             | Site 1                            | 25       | 482 (421-543)        |
|             | Site 2                            | 17       | 740 (636-843)        |
|             | Site 3                            | 26       | 769 (711-828)        |

**Supplementary Table 5. Results of the PERMANOVA analysis for the three fluorescence parameters.** Pairwise tests are shown for significant factors. df: degrees of freedom; SS: sum of squares; MS: mean squares. Significant differences are indicated in bold.

| <i><math>\Delta F/F_m'</math></i>           |     |       |       |              |              | <i>F</i>                                    |     |         |       |              |              | <i>F_m'</i>                                 |     |        |       |              |              |
|---------------------------------------------|-----|-------|-------|--------------|--------------|---------------------------------------------|-----|---------|-------|--------------|--------------|---------------------------------------------|-----|--------|-------|--------------|--------------|
| Source                                      | df  | SS    | MS    | Pseudo-F     | P(perm)      | Source                                      | df  | SS      | MS    | Pseudo-F     | P(perm)      | Source                                      | df  | SS     | MS    | Pseudo-F     | P(perm)      |
| Site                                        | 2   | 0.006 | 0.003 | 0.548        | 0.553        | Site                                        | 2   | 0.424   | 0.212 | 28.588       | <b>0.001</b> | Site                                        | 2   | 3.597  | 1.798 | 28.417       | <b>0.001</b> |
| Hour                                        | 2   | 0.336 | 0.168 | 29.254       | <b>0.001</b> | Hour                                        | 2   | 1.298   | 0.649 | 87.590       | <b>0.001</b> | Hour                                        | 2   | 9.560  | 4.780 | 75.537       | <b>0.001</b> |
| Site x Hour                                 | 4   | 0.026 | 0.006 | 1.115        | 0.357        | Site x Hour                                 | 4   | 0.044   | 0.011 | 1.484        | 0.198        | Site x Hour                                 | 4   | 0.343  | 0.086 | 1.356        | 0.232        |
| Res                                         | 344 | 1.978 | 0.006 |              |              | Res                                         | 344 | 2.550   | 0.007 |              |              | Res                                         | 344 | 21.769 | 0.063 |              |              |
| Total                                       | 352 | 2.345 |       |              |              | Total                                       | 352 | 4.3202  |       |              |              | Total                                       | 352 | 35.516 |       |              |              |
| <b>Pairwise tests for the factor "Hour"</b> |     |       |       |              |              | <b>Pairwise tests for the factor "Hour"</b> |     |         |       |              |              | <b>Pairwise tests for the factor "Hour"</b> |     |        |       |              |              |
| Groups                                      |     | t     |       | P(perm)      |              | Groups                                      |     | t       |       | P(perm)      |              | Groups                                      |     | t      |       | P(perm)      |              |
| 9:00-13:00 vs 18:00-20:00                   |     | 7.323 |       | <b>0.001</b> |              | 9:00-13:00 vs 18:00-20:00                   |     | 10.008  |       | <b>0.001</b> |              | 9:00-13:00 vs 18:00-20:00                   |     | 10.392 |       | <b>0.001</b> |              |
| 9:00-13:00 vs 20:00-22:00                   |     | 3.980 |       | <b>0.001</b> |              | 9:00-13:00 vs 20:00-22:00                   |     | 2.843   |       | <b>0.008</b> |              | 9:00-13:00 vs 20:00-22:00                   |     | 0.295  |       | 0.783        |              |
| 18:00-20:00 vs 20:00-22:00                  |     | 1.416 |       | 0.155        |              | 18:00-20:00 vs 20:00-22:00                  |     | 11.537  |       | <b>0.001</b> |              | 18:00-20:00 vs 20:00-22:00                  |     | 10.653 |       | <b>0.001</b> |              |
| <b>Pairwise tests for the factor "Site"</b> |     |       |       |              |              | <b>Pairwise tests for the factor "Site"</b> |     |         |       |              |              |                                             |     |        |       |              |              |
| Groups                                      |     | t     |       | P(perm)      |              | Groups                                      |     | t       |       | P(perm)      |              |                                             |     |        |       |              |              |
| Site 1 vs Site 2                            |     | 5.497 |       | <b>0.001</b> |              | Site 1 vs Site 2                            |     | 6.16    |       | <b>0.001</b> |              |                                             |     |        |       |              |              |
| Site 1 vs Site 3                            |     | 7.388 |       | <b>0.001</b> |              | Site 1 vs Site 3                            |     | 7.4738  |       | <b>0.001</b> |              |                                             |     |        |       |              |              |
| Site 2 vs Site 3                            |     | 0.743 |       | 0.460        |              | Site 2 vs Site 3                            |     | 0.31678 |       | 0.769        |              |                                             |     |        |       |              |              |

**Supplementary Table 6.**  $\delta^{13}\text{C}$ ,  $\delta^{15}\text{N}$  and C/N ratios for host tissue and algal symbionts in Sites 1 (control), 2 (intermediate  $\text{pCO}_2$ ) and 3 (high  $\text{pCO}_2$ ). Pairwise comparisons between Sites were performed with a post-hoc Fisher least significant differences test (LSD). N = 4 specimens for each Site. NS: Not Significant, \*\* $p < 0.01$ , \*\*\* $p < 0.001$ .

|                           |        | Pairwise comparison |                |        |        |                |
|---------------------------|--------|---------------------|----------------|--------|--------|----------------|
|                           |        | Tissue              | Algal symbiont | Sites  | Tissue | Algal symbiont |
| $\delta^{13}\text{C}$ (‰) | Site 1 | -19.55              | -16.27         | 1 vs 2 | NS     | NS             |
|                           |        | -19.99              | -15.09         |        |        |                |
|                           |        | -19.20              | -15.64         |        |        |                |
|                           |        | -18.08              | -14.26         |        |        |                |
|                           | Site 2 | -18.89              | -13.95         | 1 vs 3 | NS     | NS             |
|                           |        | -19.13              | -14.57         |        |        |                |
|                           |        | -21.41              | -15.59         |        |        |                |
|                           |        | -19.68              | -12.98         |        |        |                |
|                           | Site 3 | -17.95              | -13.43         | 2 vs 3 | NS     | NS             |
|                           |        | -17.93              | -18.40         |        |        |                |
|                           |        | -19.41              | -18.21         |        |        |                |
|                           |        | -19.55              | -14.67         |        |        |                |
| $\delta^{15}\text{N}$ (‰) | Site 1 | 3.57                | 3.10           | 1 vs 2 | ***    | NS             |
|                           |        | 3.05                | 2.31           |        |        |                |
|                           |        | 3.92                | 1.69           |        |        |                |
|                           |        | 3.86                | 1.53           |        |        |                |
|                           | Site 2 | 0.80                | 1.50           | 1 vs 3 | ***    | NS             |
|                           |        | -0.64               | 1.82           |        |        |                |
|                           |        | -0.71               | 1.92           |        |        |                |
|                           |        | 0.03                | 0.65           |        |        |                |
|                           | Site 3 | 0.93                | 0.56           | 2 vs 3 | NS     | NS             |
|                           |        | 0.83                | 0.49           |        |        |                |
|                           |        | -0.04               | 0.74           |        |        |                |
|                           |        | 0.03                | 3.26           |        |        |                |
| C/N ratio                 | Site 1 | 5.60                | 6.56           | 1 vs 2 | ***    | **             |
|                           |        | 4.95                | 6.36           |        |        |                |
|                           |        | 5.76                | 6.40           |        |        |                |
|                           |        | 6.16                | 7.45           |        |        |                |
|                           | Site 2 | 1.14                | 8.67           | 1 vs 3 | ***    | ***            |
|                           |        | 0.32                | 8.10           |        |        |                |
|                           |        | 0.09                | 7.56           |        |        |                |
|                           |        | 0.19                | 9.78           |        |        |                |
|                           | Site 3 | 1.26                | 11.25          | 2 vs 3 | NS     | **             |
|                           |        | 1.94                | 11.00          |        |        |                |
|                           |        | 0.24                | 10.72          |        |        |                |
|                           |        | 0.46                | 9.86           |        |        |                |
