# Supplementary material for: Acclimatization of a coral-dinoflagellate mutualism at a CO2 vent
Source: Springer Nature journal article supplement (doi:10.1038/s42003-022-04327-3), 2023-01-18
Supplement: MOESM3 [file 42003_2022_4327_MOESM3_ESM.pdf]

## Description of Additional Supplementary Files

**File name:** Supplementary Data 1

**Description:** Alignment of psbA non-coding region haplotype sequences for *Philozoon balanophyllum*.

**File name:** Supplementary Data 2

**Description:** The source data behind the graphs in the paper.
